# Supplementary material for: Prediction of the Tribological Properties of Polytetrafluoroethylene Composites Based on Experiments and Machine Learning
Source: MDPI journal article supplement (doi:10.3390/polym16030356), 2024-01-28

**Table S1.**

Friction coefficient of PTFE composites.

| Temperature (°C) | Load (MPa) | Speed (m/s) | Friction coefficient |
|------------------|------------|-------------|----------------------|
| 25               | 0.05       | 10          | 0.058                |
| 25               | 0.05       | 15          | 0.049                |
| 25               | 0.05       | 20          | 0.041                |
| 25               | 0.05       | 25          | 0.04                 |
| 25               | 0.1        | 10          | 0.035                |
| 25               | 0.1        | 15          | 0.031                |
| 25               | 0.1        | 20          | 0.026                |
| 25               | 0.1        | 25          | 0.024                |
| 50               | 0.05       | 10          | 0.07                 |
| 50               | 0.05       | 15          | 0.07                 |
| 50               | 0.05       | 20          | 0.053                |
| 50               | 0.05       | 25          | 0.054                |
| 50               | 0.1        | 10          | 0.038                |
| 50               | 0.1        | 15          | 0.033                |
| 50               | 0.1        | 20          | 0.038                |
| 50               | 0.1        | 25          | 0.031                |
| 90               | 0.05       | 10          | 0.069                |
| 90               | 0.05       | 15          | 0.059                |
| 90               | 0.05       | 20          | 0.05                 |
| 90               | 0.05       | 25          | 0.043                |
| 90               | 0.1        | 10          | 0.038                |
| 90               | 0.1        | 15          | 0.039                |
| 90               | 0.1        | 20          | 0.032                |
| 90               | 0.1        | 25          | 0.035                |
| 120              | 0.05       | 10          | 0.061                |
| 120              | 0.05       | 15          | 0.05                 |
| 120              | 0.05       | 20          | 0.045                |
| 120              | 0.05       | 25          | 0.046                |
| 120              | 0.1        | 10          | 0.034                |
| 120              | 0.1        | 15          | 0.031                |
| 120              | 0.1        | 20          | 0.029                |
| 120              | 0.1        | 25          | 0.027                |

|     |      |    |       |
|-----|------|----|-------|
| 150 | 0.05 | 10 | 0.069 |
| 150 | 0.05 | 15 | 0.06  |
| 150 | 0.05 | 20 | 0.064 |
| 150 | 0.05 | 25 | 0.06  |
| 150 | 0.1  | 10 | 0.033 |
| 150 | 0.1  | 15 | 0.03  |
| 150 | 0.1  | 20 | 0.025 |
| 150 | 0.1  | 25 | 0.026 |

**Table S2.**

Wear rate of PTFE composites.

| Temperature (°C) | Load (MPa) | Speed (m/s) | Wear rate ( $\times 10^{-5}$ mm <sup>3</sup> /N·m) |
|------------------|------------|-------------|----------------------------------------------------|
| 25               | 0.05       | 10          | 3.14                                               |
| 25               | 0.05       | 15          | 2.1                                                |
| 25               | 0.05       | 20          | 2.52                                               |
| 25               | 0.05       | 25          | 2.42                                               |
| 25               | 0.1        | 10          | 2.36                                               |
| 25               | 0.1        | 15          | 1.5                                                |
| 25               | 0.1        | 20          | 1.97                                               |
| 25               | 0.1        | 25          | 1.46                                               |
| 50               | 0.05       | 10          | 4.53                                               |
| 50               | 0.05       | 15          | 2.02                                               |
| 50               | 0.05       | 20          | 2                                                  |
| 50               | 0.05       | 25          | 1.96                                               |
| 50               | 0.1        | 10          | 3.76                                               |
| 50               | 0.1        | 15          | 1.78                                               |
| 50               | 0.1        | 20          | 1.81                                               |
| 50               | 0.1        | 25          | 1.72                                               |
| 90               | 0.05       | 10          | 4.14                                               |
| 90               | 0.05       | 15          | 2.99                                               |
| 90               | 0.05       | 20          | 2.33                                               |
| 90               | 0.05       | 25          | 2.4                                                |
| 90               | 0.1        | 10          | 3.25                                               |
| 90               | 0.1        | 15          | 1.69                                               |
| 90               | 0.1        | 20          | 1.55                                               |
| 90               | 0.1        | 25          | 1.62                                               |
| 120              | 0.05       | 10          | 4.87                                               |
| 120              | 0.05       | 15          | 3.77                                               |
| 120              | 0.05       | 20          | 3.86                                               |
| 120              | 0.05       | 25          | 2.76                                               |
| 120              | 0.1        | 10          | 3.27                                               |
| 120              | 0.1        | 15          | 2.04                                               |
| 120              | 0.1        | 20          | 1.75                                               |
| 120              | 0.1        | 25          | 2.06                                               |

|     |      |    |      |
|-----|------|----|------|
| 150 | 0.05 | 10 | 5.25 |
| 150 | 0.05 | 15 | 4.14 |
| 150 | 0.05 | 20 | 3.39 |
| 150 | 0.05 | 25 | 3.64 |
| 150 | 0.1  | 10 | 3.84 |
| 150 | 0.1  | 15 | 2.92 |
| 150 | 0.1  | 20 | 2.58 |
| 150 | 0.1  | 25 | 2.5  |

**Figure S1. Worn morphologies under different speeds, temperatures, and loads.**

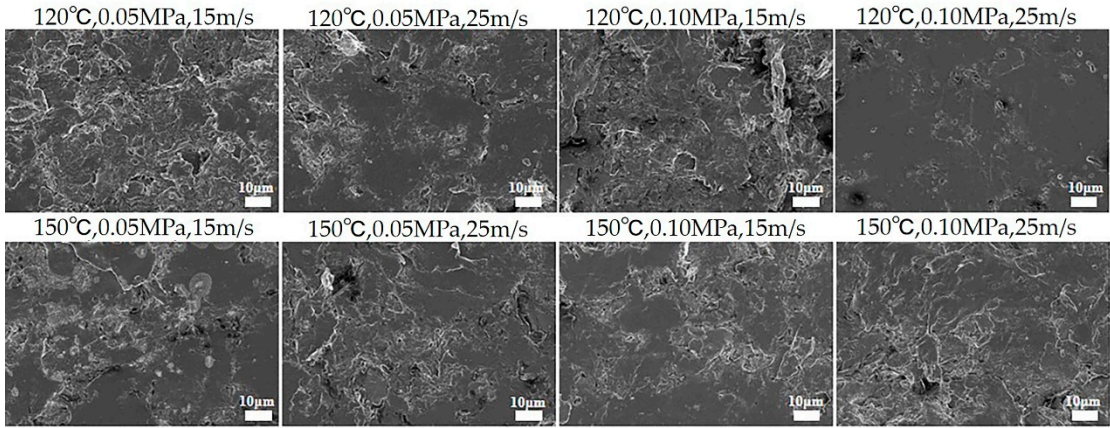

Supplement: s1 [file s1]
